# Supplementary material for: Particle Size Matters: Distribution, Source, and Seasonality Characteristics of Airborne and Pathogenic Bacteria in Wastewater Treatment Plants
Source: MDPI journal article supplement (doi:10.3390/atmos14030465), 2023-02-26
Supplement: s1 [file s1]

Archive with 1 entries (1 files):
- atmosphere-2213145-supplementary.pdf
