# Supplementary material for: Particle Size Matters: Distribution, Source, and Seasonality Characteristics of Airborne and Pathogenic Bacteria in Wastewater Treatment Plants
Source: MDPI journal article supplement (doi:10.3390/atmos14030465), 2023-02-26
Supplement: s1 [file s1 › atmosphere-2213145-supplementary.pdf]

# Supplementary Materials

## Particle Size Matters: Distribution, Source, and Seasonality Characteristics of Airborne and Pathogenic Bacteria in Wastewater Treatment Plants

Jianan Wan <sup>1</sup>, Zhiruo Zhang <sup>2</sup>, Yang Huo <sup>1,3,\*</sup>, Xianze Wang <sup>1</sup>, Yifan Wang <sup>1</sup>, Jinghui Wu <sup>1,2</sup> and Mingxin Huo <sup>1</sup>

<sup>1</sup> Science and Technology Innovation Center for Municipal Wastewater Treatment and Water Quality Protection, Northeast Normal University, Changchun 130117, China; wanjn131@nenu.edu.cn (J.W.); wangxz940@nenu.edu.cn (X.W.); wangyf678@nenu.edu.cn (Y.W.); wujinghui@jlju.edu.cn (J.W.); huomx097@nenu.edu.cn (M.H.)

<sup>2</sup> Key Laboratory of Songliao Aquatic Environment, Ministry of Education, Jilin Jianzhu University, Changchun 130118, China; zhangzhiruo@jlju.edu.cn

<sup>3</sup> Center for Advanced Optoelectronic Functional Materials Research, Key Laboratory of UV Light-Emitting Materials and Technology of Ministry of Education, Northeast Normal University, Changchun 130024, China

\* Correspondence: huo0814@outlook.com or huoy362@nenu.edu.cn

**Table S1.** meteorological conditions.

| Site     | T (°C) | RH (%) | SR (W/m <sup>3</sup> ) | W (m/s) |
|----------|--------|--------|------------------------|---------|
| D_AT1-8  | 26.51  | 41.88  | 687.62                 | 0.77    |
| D_SST1-8 | 26.5   | 40.79  | 654.31                 | 0.83    |
| D_SRD1-8 | 27.91  | 41.52  | 65.23                  | 0.03    |
| D_SR1-8  | 26.85  | 98.67  | 71.25                  | 0.04    |
| C_AT1-8  | 26.18  | 39.47  | 678.22                 | 0.64    |
| C_SST1-8 | 26.57  | 38.67  | 657.9                  | 0.52    |
| C_SRD1-8 | 25.71  | 42.64  | 2.45                   | 0.02    |
| C_SR1-8  | 26.54  | 83.68  | 122.6                  | 0.05    |
| D_AT_AUT | 17.91  | 26.34  | 421.12                 | 0.82    |
| D_AT_WIN | 0.21   | 43.81  | 378.23                 | 1.22    |

D: Plant D, C: Plant C;

AT: aeration tank, SST: secondary settling tank, SDR: sludge dewatering room, SR: screen room;

AUT: autumn, WIN: winter;

1-8: represent eight particle-size stages.

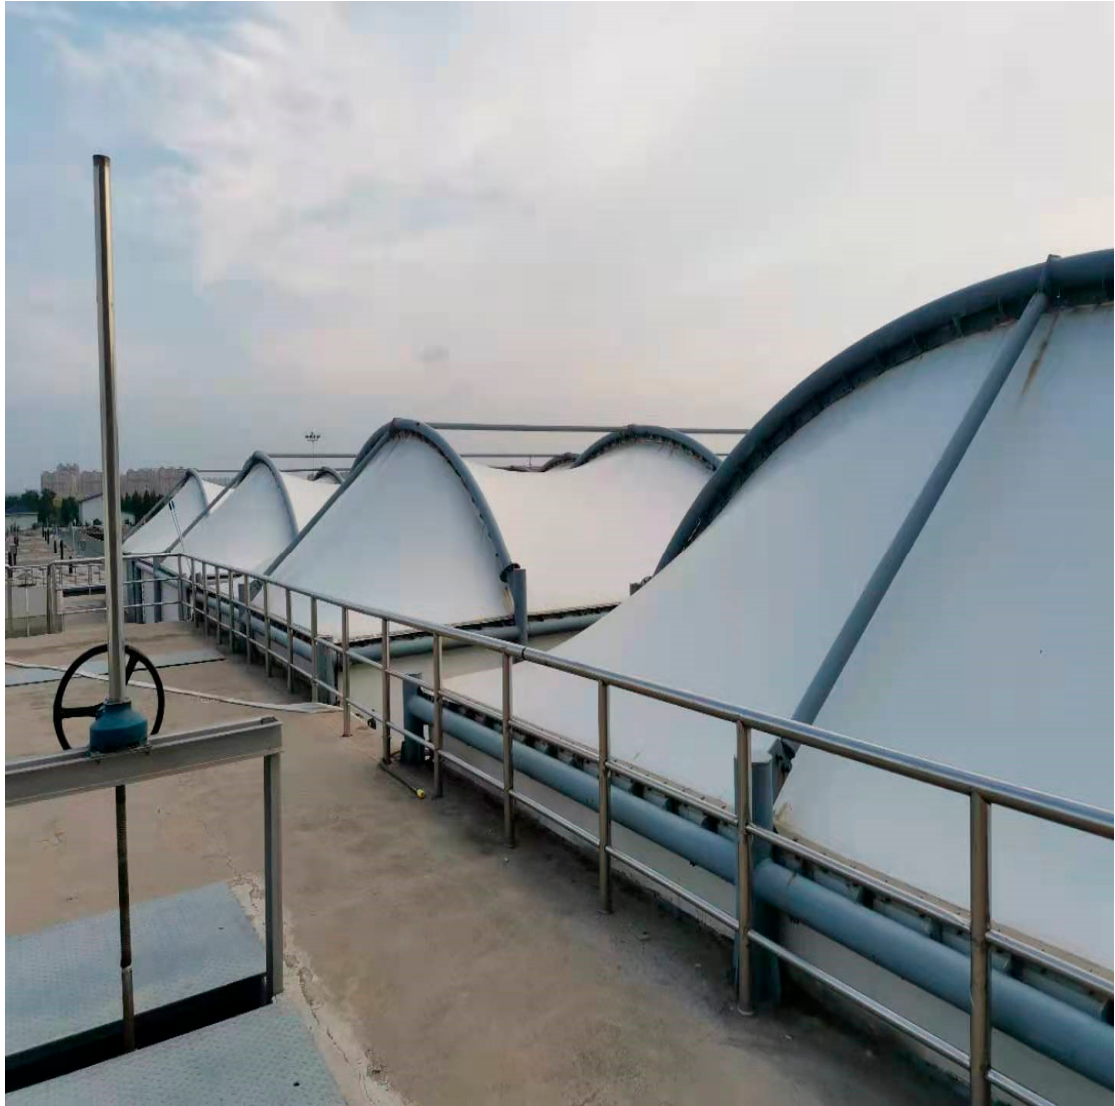

**Figure S1.** The picture of cover and deodorization in plant D.

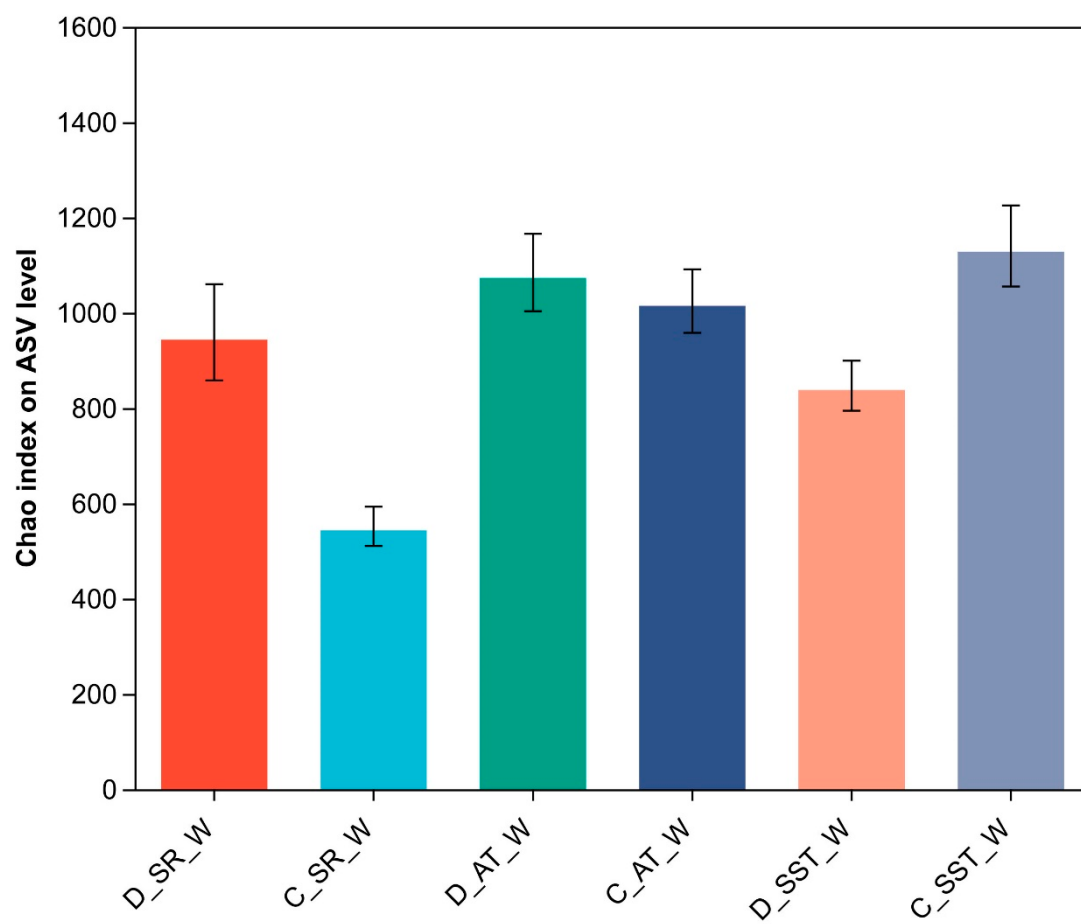

**Figure S2.** Chao of wastewater from the treatment unit of both plants.

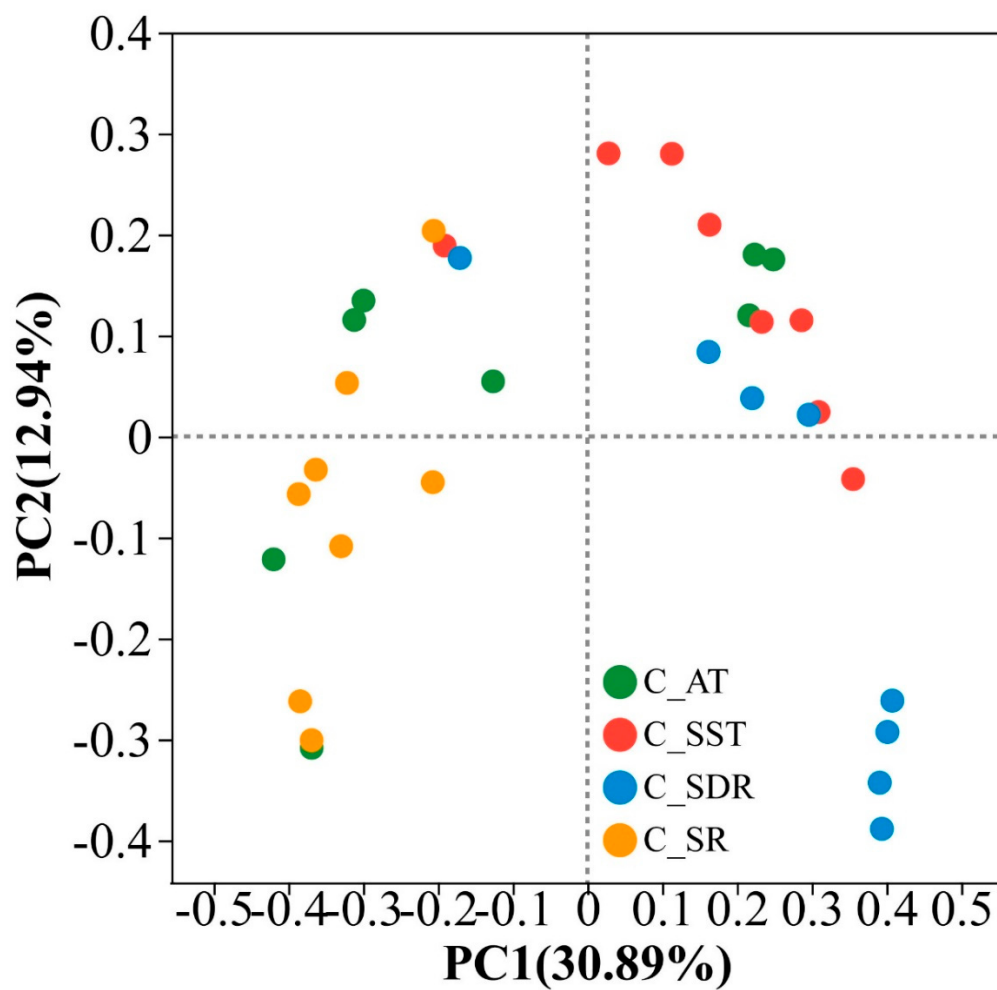

**Figure S3.** PCoA using unweighted UniFrac distances matrix to calculate Plant C samples. AT: aer-  
ation tank, SST: secondary settling tank, SDR: sludge dewatering room, SR: screen room, and C:  
Plant C.

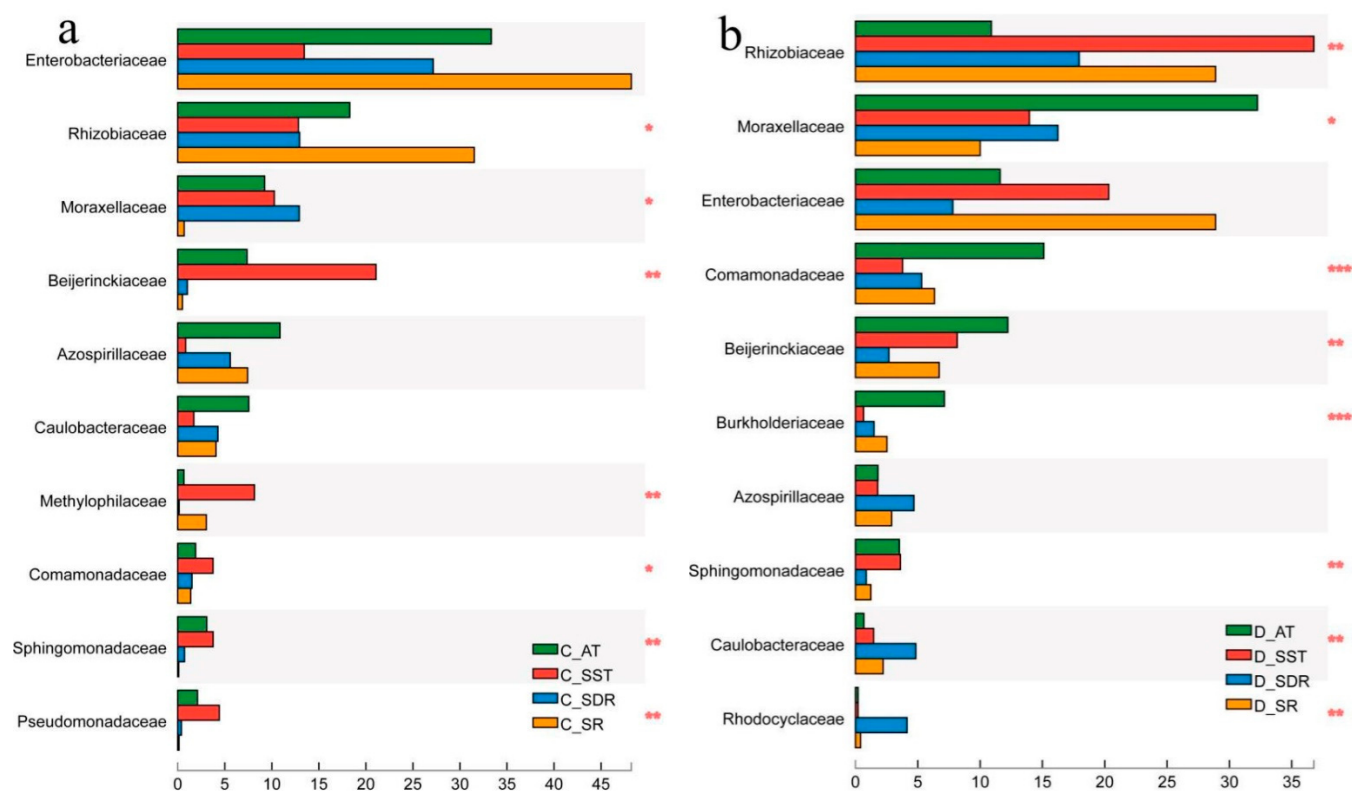

**Figure S4.** The difference in species composition at the top 15 family level of relative abundance among treatment units in Plant C (a) and Plant D (b). AT: aeration tank, SST: secondary settling tank, SDR: sludge dewatering room, SR: screen room. \* Significant at 0.05 probability level, \*\* significant at 0.01 probability level, \*\*\* significant at 0.001 probability level.

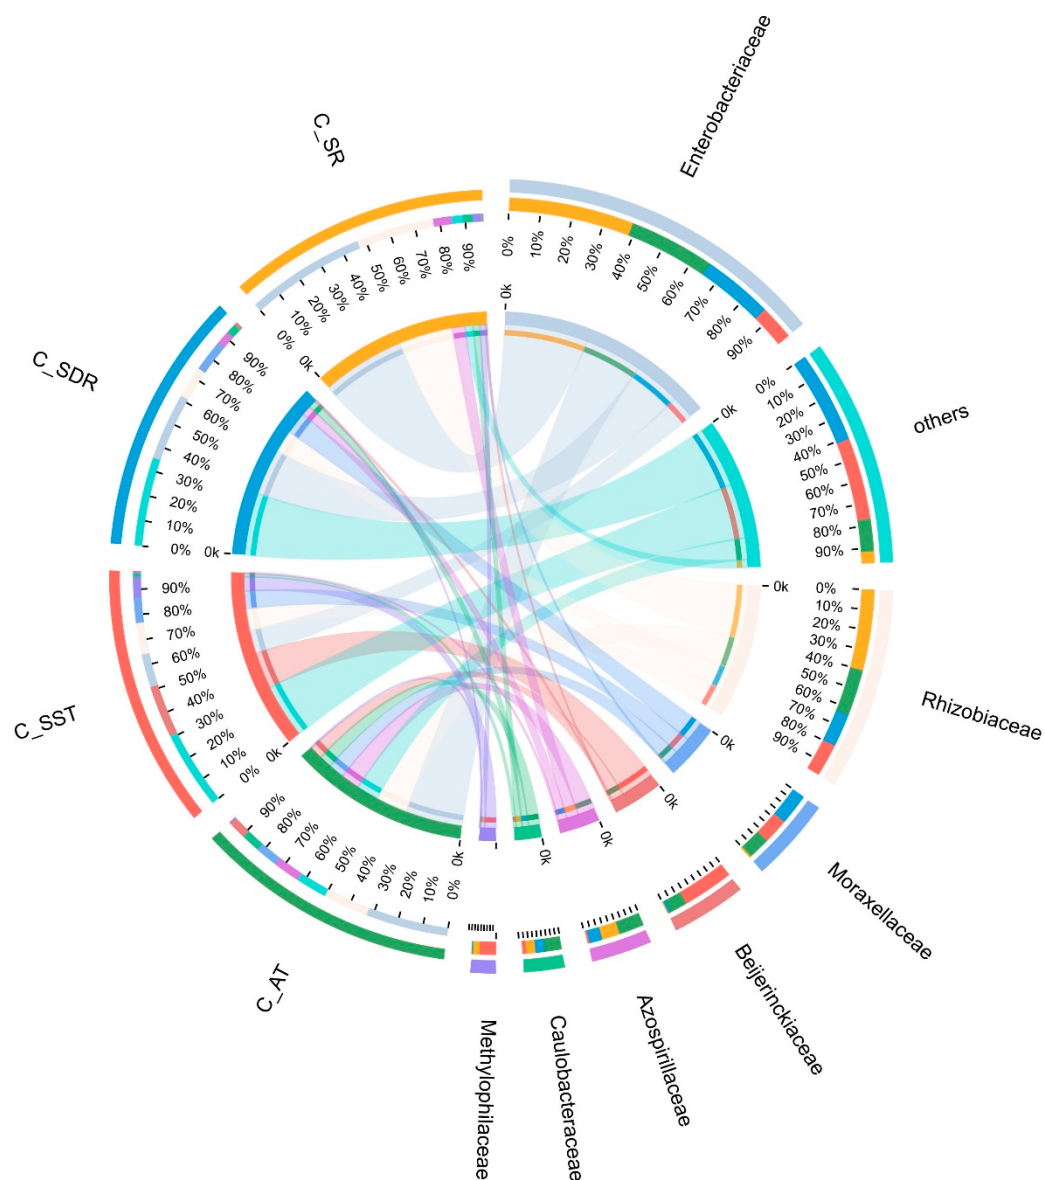

**Figure S5.** Circos plots exhibit the species composition of Plant C at the top 95% of family level of relative abundance in distinct treatment units. C\_AT: aeration tank of Plant C, C\_SST: secondary settling tank of C plant, C\_SDR: sludge dewatering room of Plant C, and C\_SR: screen room of Plant C.

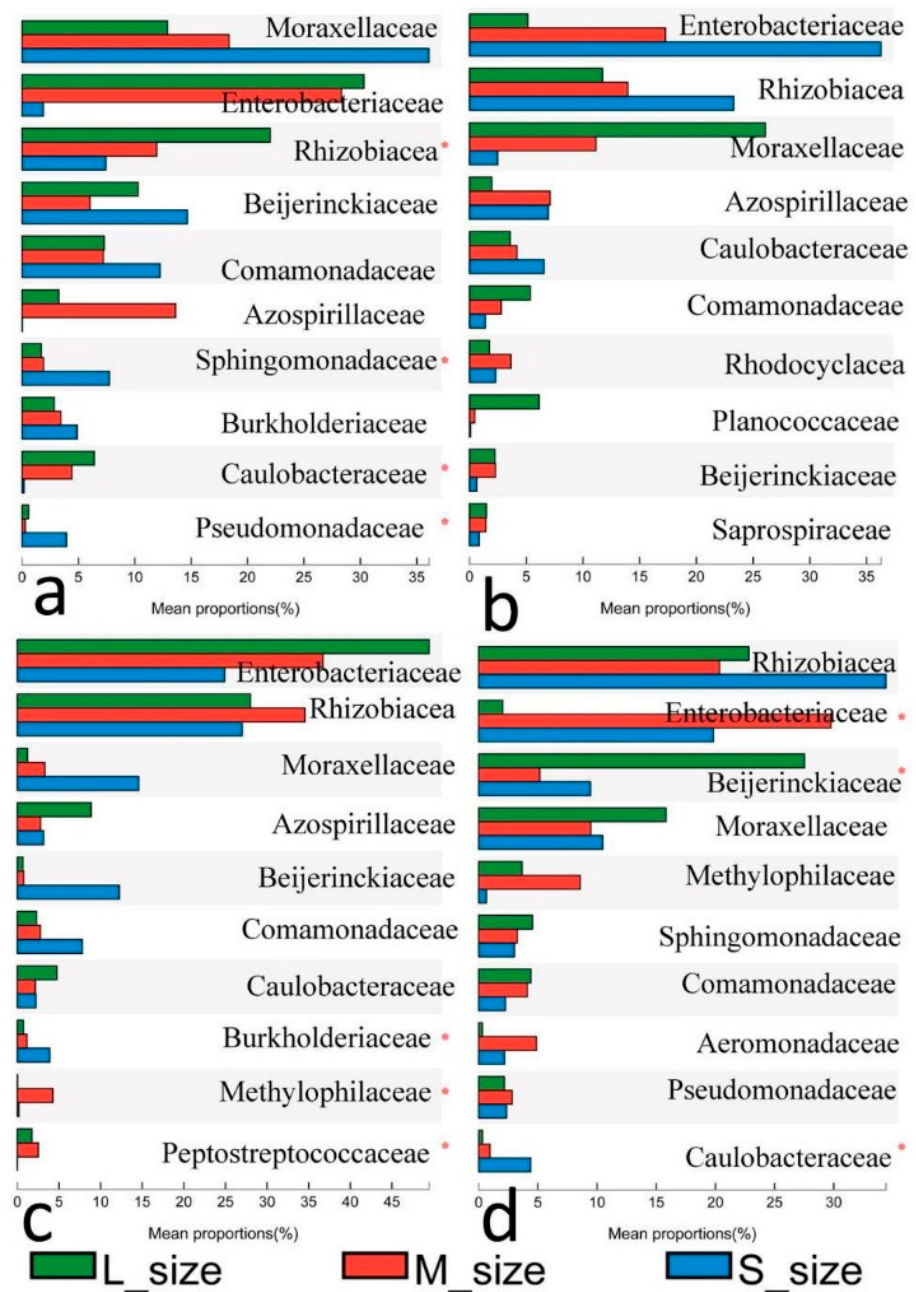

**Figure S6.** The difference in species composition at the top 15 family level of relative abundance among size distributions in AT (a), SDR (b), SR(c) and SST(d). L\_size: large particles, M\_size: medium particles, S\_size: small particles.

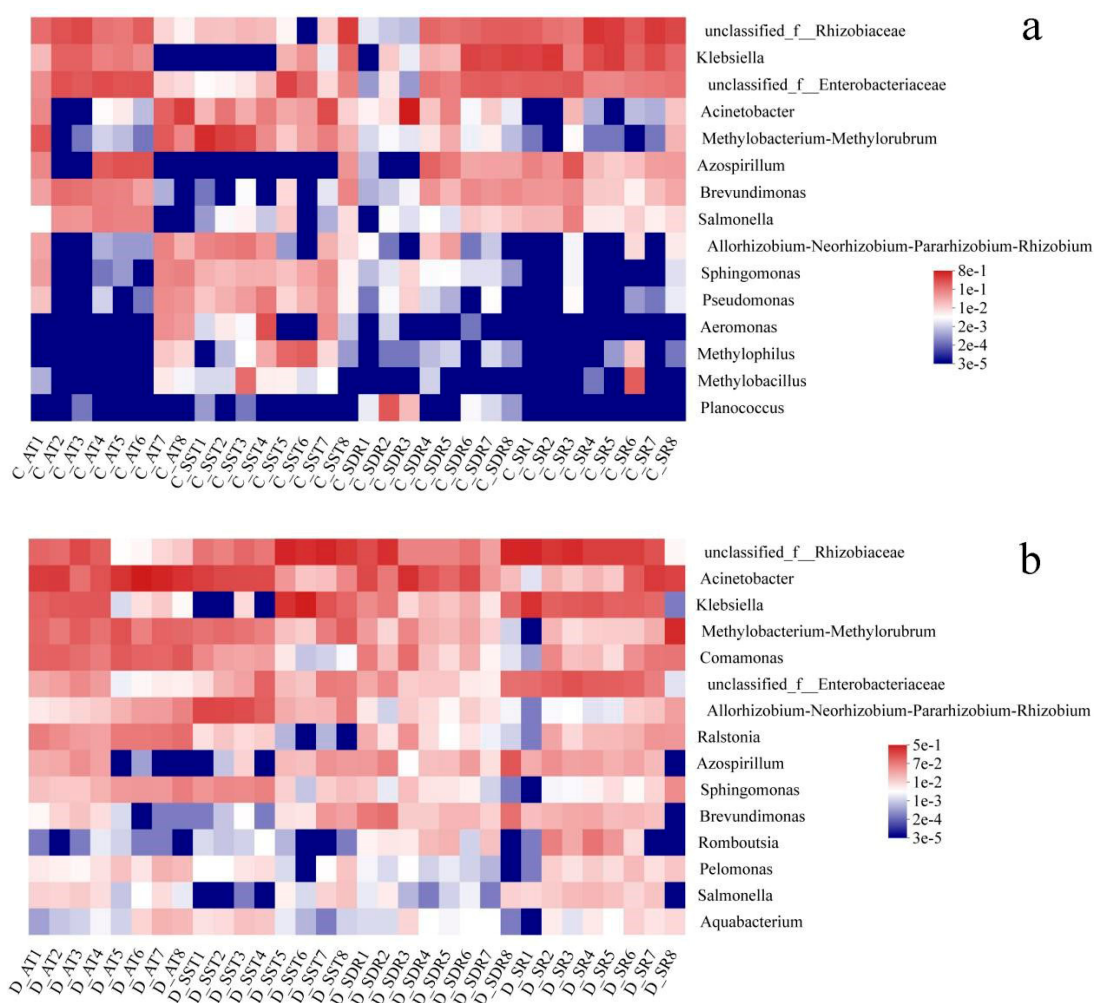

**Figure S7.** Heatmap of the main 15 bacterial genera in Plant C (a) and Plant D (b). The color gradient indicates the size of the proportion of species, 1-8: represent eight particle-size stages. AT: aeration tank, SST: secondary settling tank, SDR: sludge dewatering room, and SR: screen room, A: aerosol sample, and W: water sample.

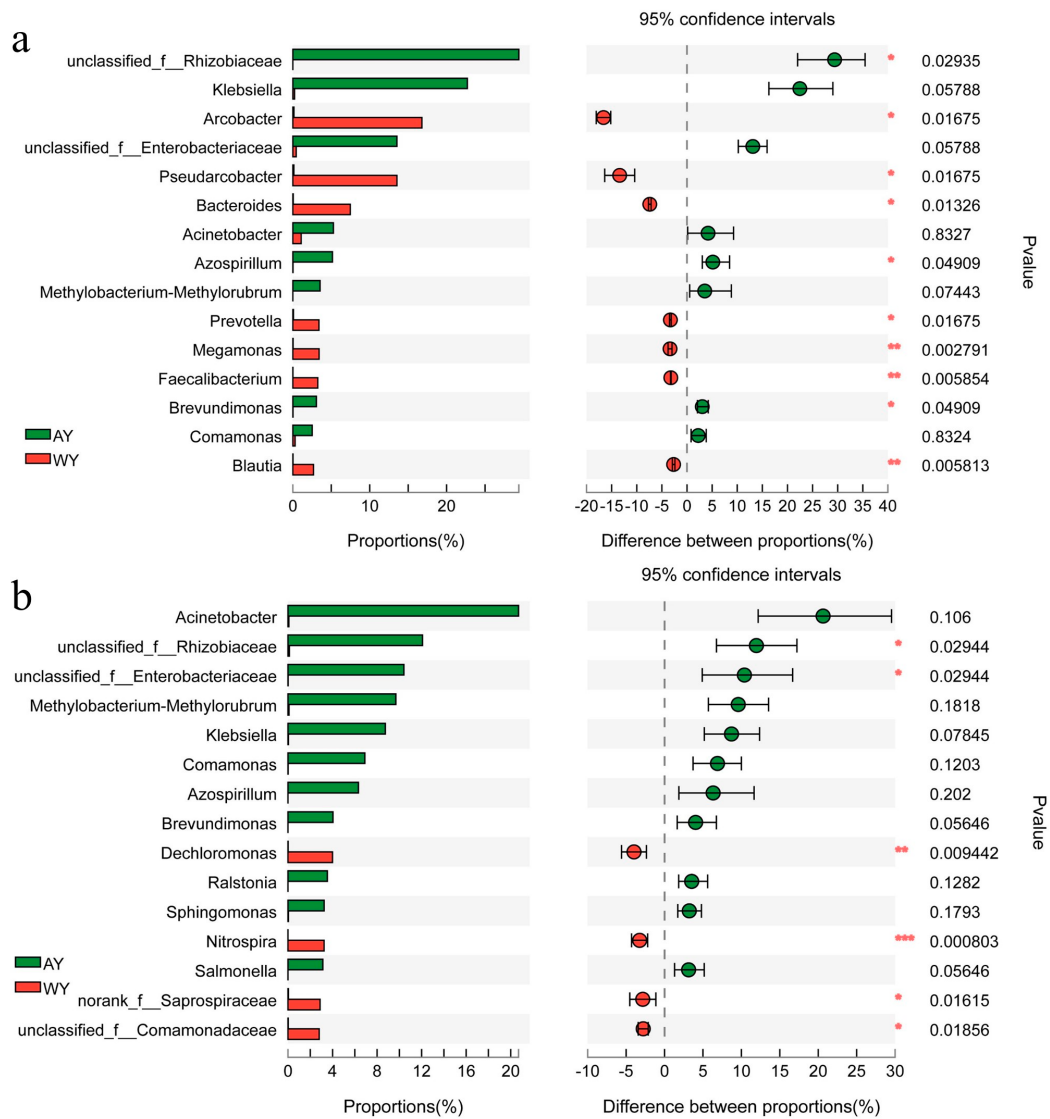

**Figure S8.** The difference in species composition at the top 15 genus level of relative abundance among wastewater (WY: red) and aerosols (AY: green) in SR (a) and AT (b).

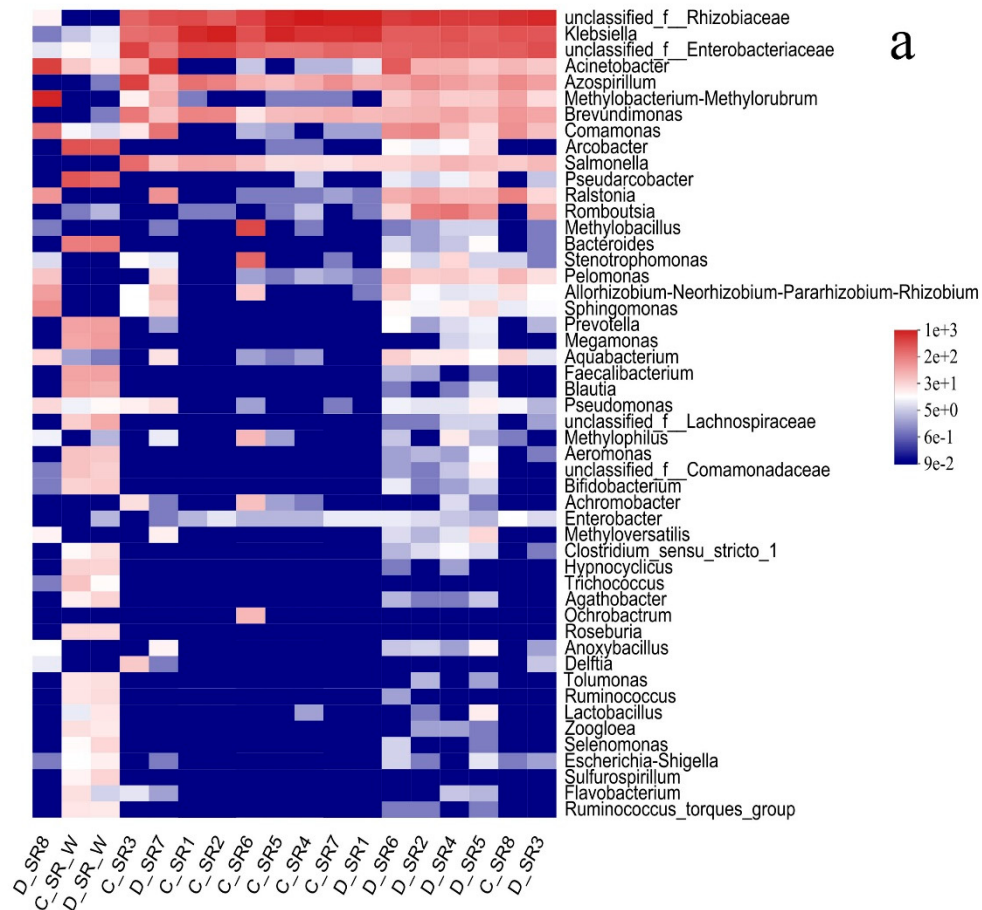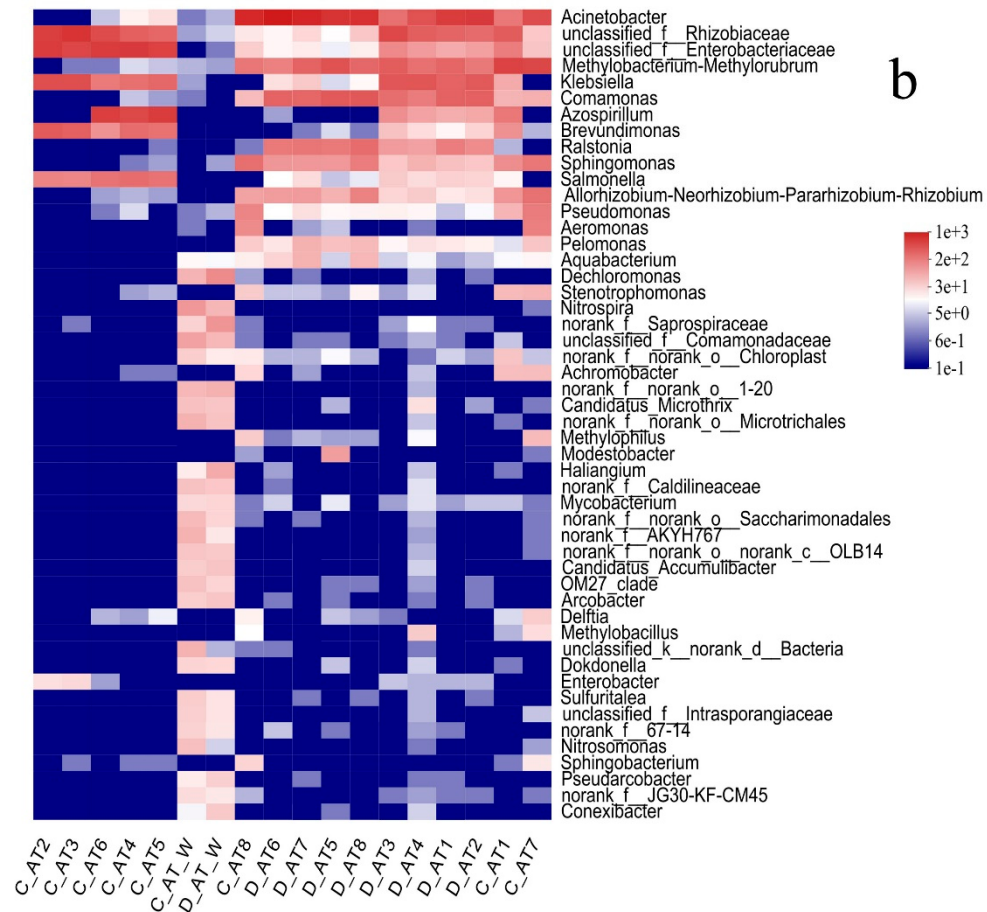

**Figure S9.** Heatmap of the main 50 bacterial genera in SR (a) and AT (b). The color gradient indicates the size of the proportion of species. 1-8: represent eight size stages. C\_AT: aeration tank of Plant C, D\_AT: aeration tank of Plant D, C\_SR: screen room of Plant C, D\_SR: screen room of Plant D, A: aerosol sample, and W: water sample.
